# Supplementary material
Source: ML conference proceedings conference paper supplement (https://openaccess.thecvf.com/content/ICCV_2019/html/Yang_Where_Is_My_ICCV_2019_paper.html)
Supplement: Supplementary file 1 [file Yang_Where_Is_My_ICCV_2019_supplemental.pdf]

# Where Is My Mirror? (Supplementary Material)

Xin Yang<sup>1,\*</sup>, Haiyang Mei<sup>1,\*</sup>, Ke Xu<sup>1,3</sup>, Xiaopeng Wei<sup>1</sup>, Baocai Yin<sup>1,2</sup>, Rynson W.H. Lau<sup>3,†</sup>

<sup>1</sup> Dalian University of Technology, <sup>2</sup> Peng Cheng Laboratory, <sup>3</sup> City University of Hong Kong

## 1. Overview

In this supplemental, we first show more examples of how MirrorNet can help improve depth prediction and semantic segmentation on images from the NYU-v2 dataset [5] in Section 2. We then present more image/mask pairs from our proposed MSD dataset in Section 3. Finally, we provide more comparisons to the state-of-the-arts on the proposed MSD test set in Section 4, and on some challenging images obtained from the Internet in Section 5.

## 2. Results on the NYU-v2 Dataset [5]

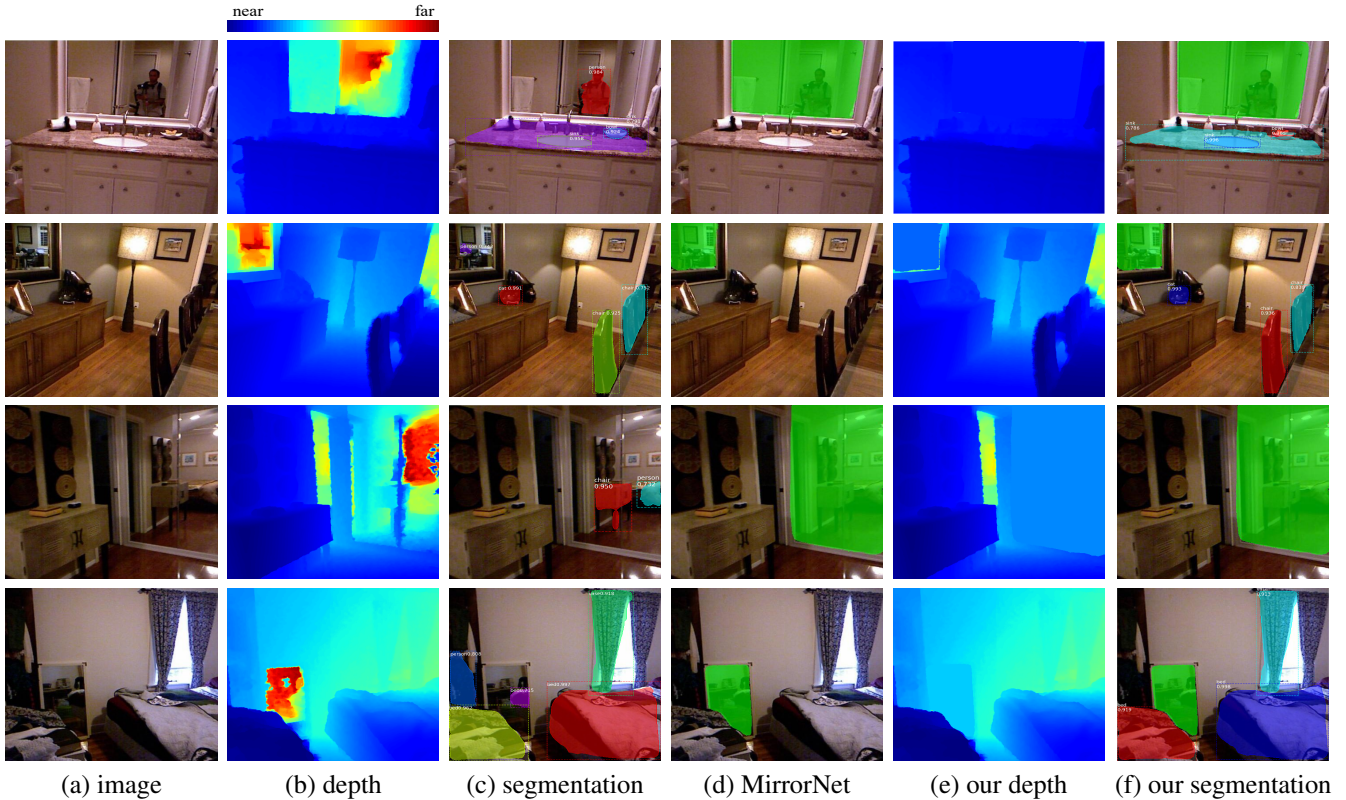

Figure 1. Problems with mirrors on existing computer vision tasks. In depth prediction, NYU-v2 dataset [5] uses Kinect to capture depth as ground truth. It fails to predict the depths of the mirrors for the mirror regions. Instead, it predicts the depths of the reflected contents for the regions (b). In instance semantic segmentation, Mask RCNN [2] wrongly detects the objects inside the mirrors (c). With our MirrorNet, we may first detect and mask out the mirrors (d). We can then obtain correct depths (e), by interpolating the depths from the surrounding pixels of the mirrors, and segmentation maps (f).

\*Joint first authors. <sup>†</sup>Rynson Lau is the corresponding author, and he led this project. Project page: [https://mhaiyang.github.io/ICCV2019\\_MirrorNet/index](https://mhaiyang.github.io/ICCV2019_MirrorNet/index)

### 3. Examples of the Proposed MSD Dataset

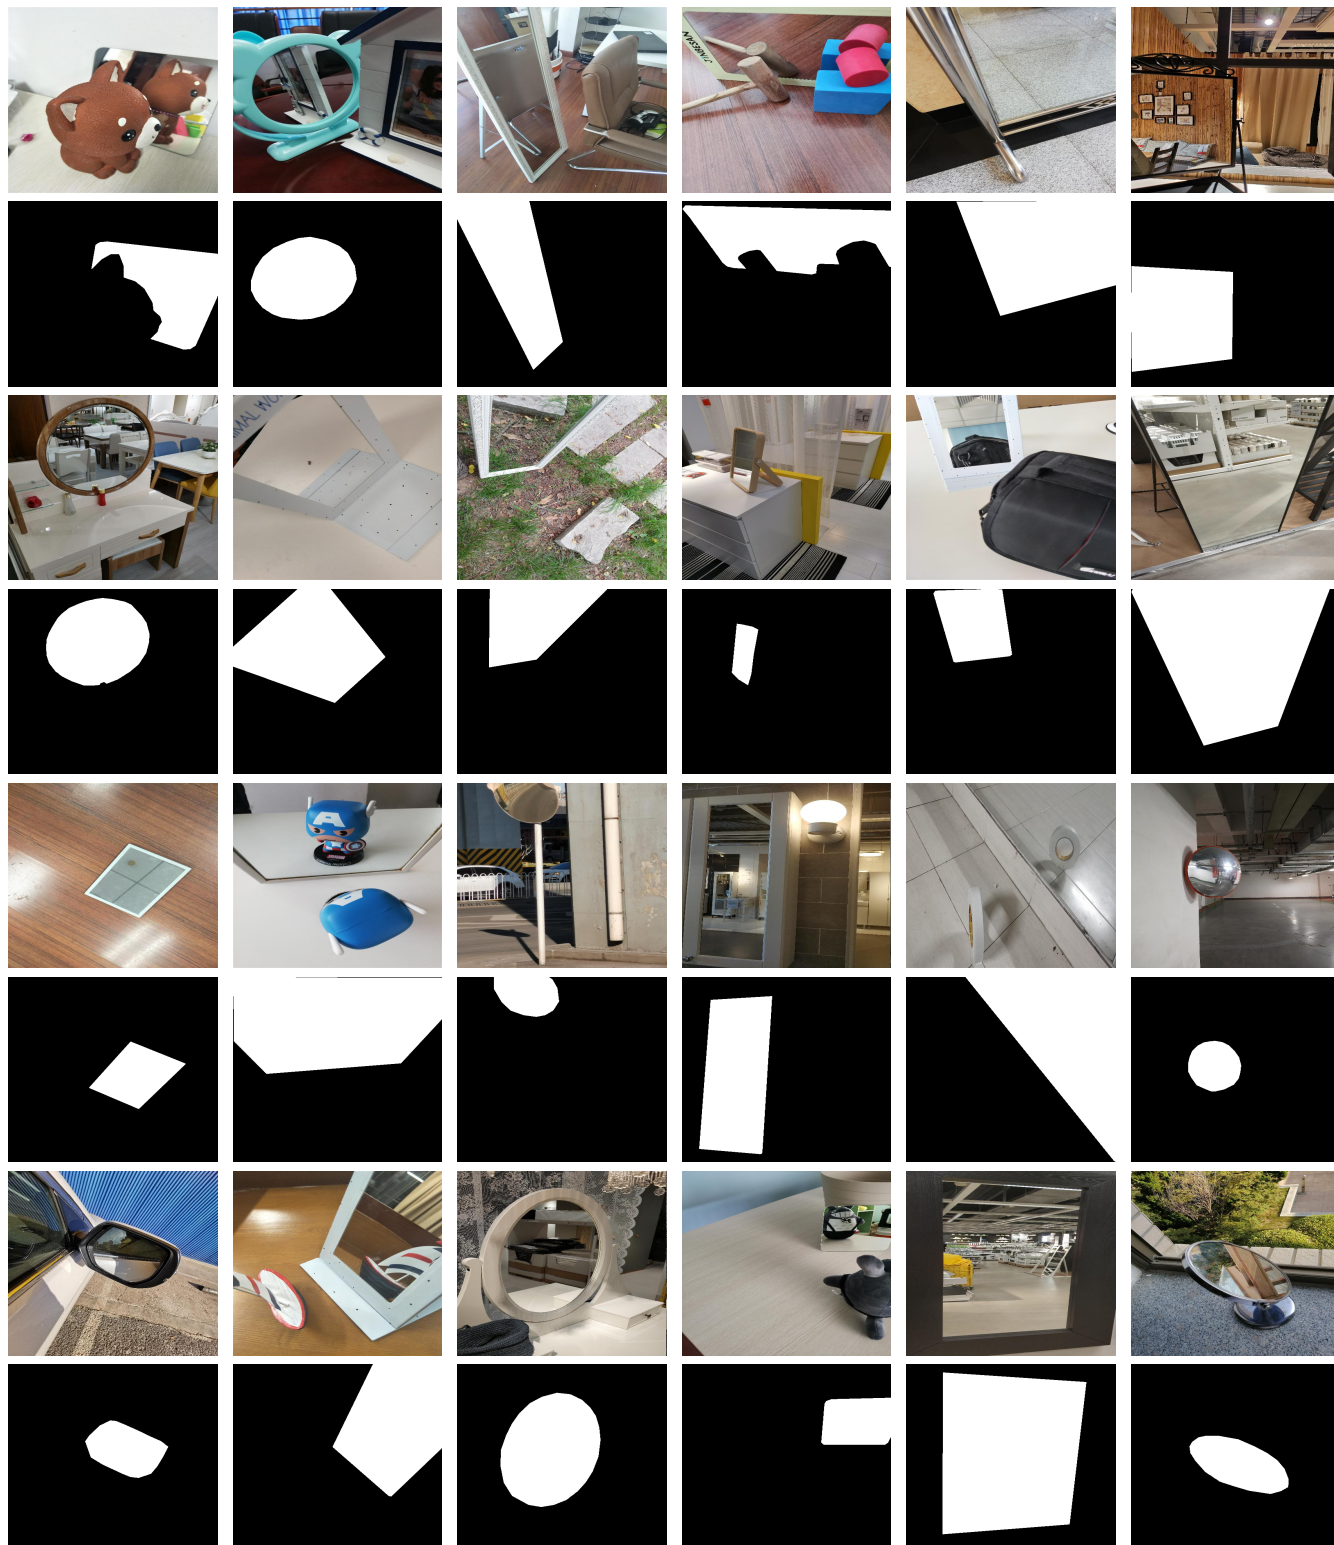

Figure 2. More example mirror image/mask pairs in our mirror segmentation dataset (MSD). It shows that our MSD covers a variety of our daily life scenes that contain mirrors.

#### 4. Comparison on the MSD Test Set

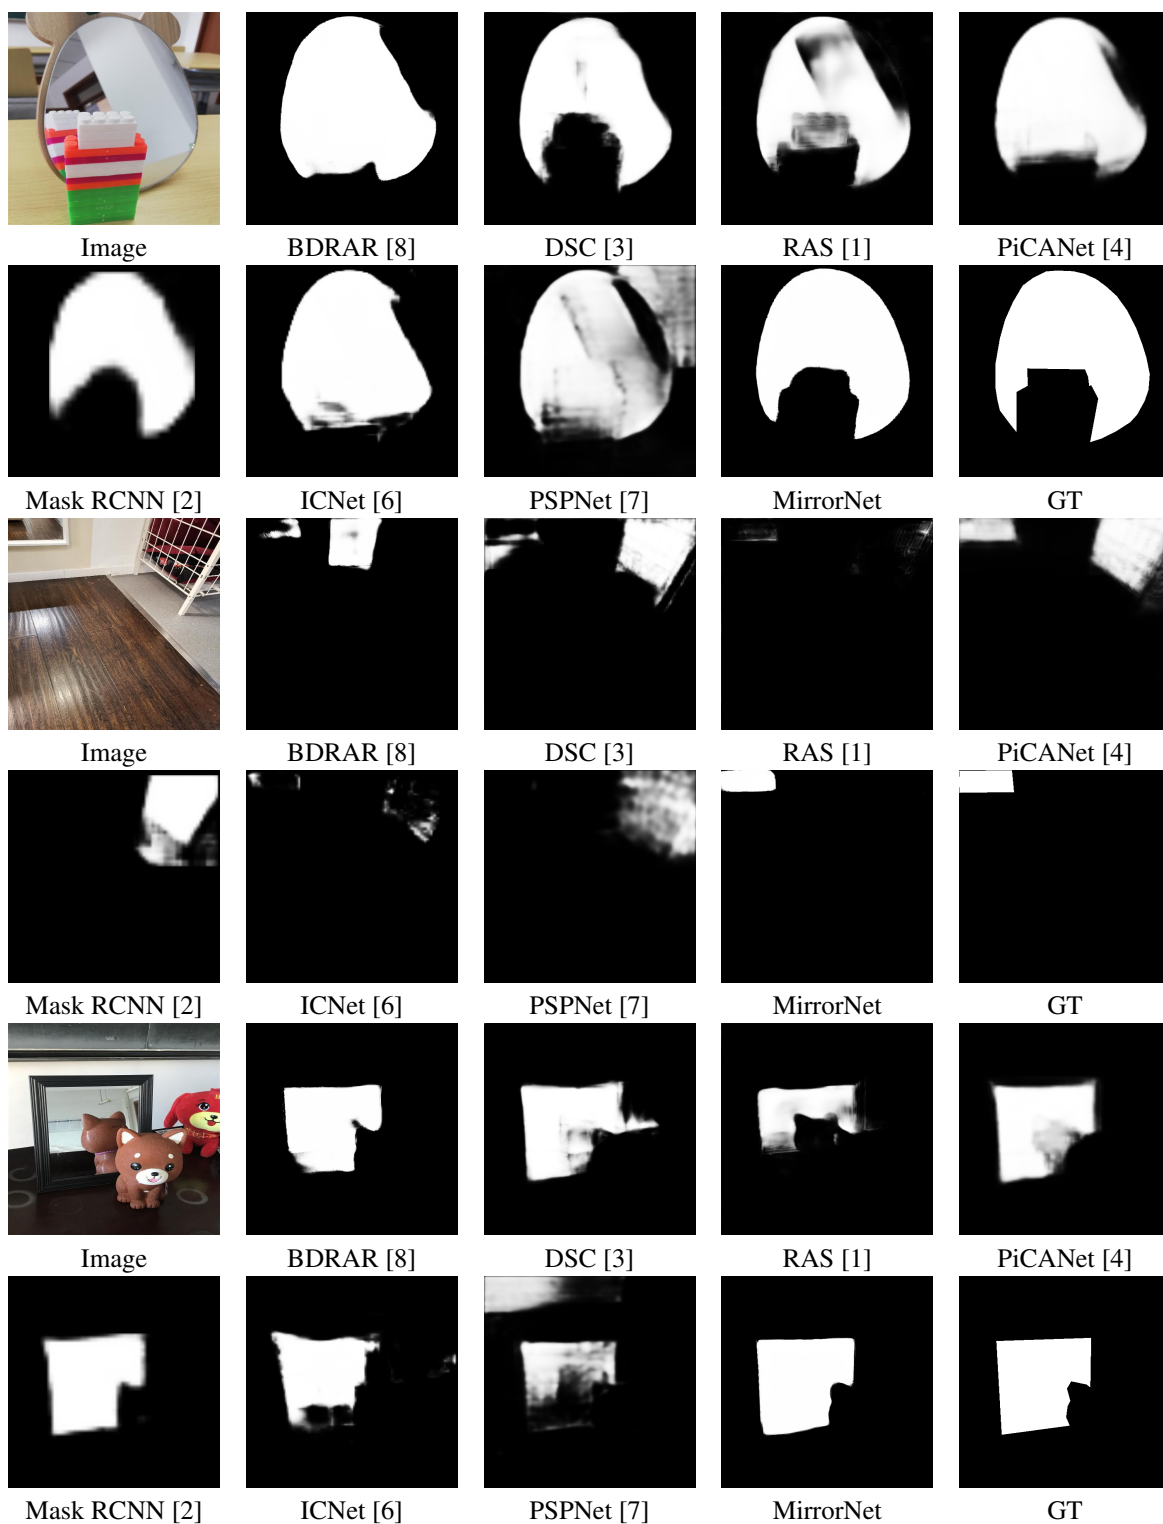

Figure 3. More visual comparison of MirrorNet to the state-of-the-art methods on the proposed MSD test set.

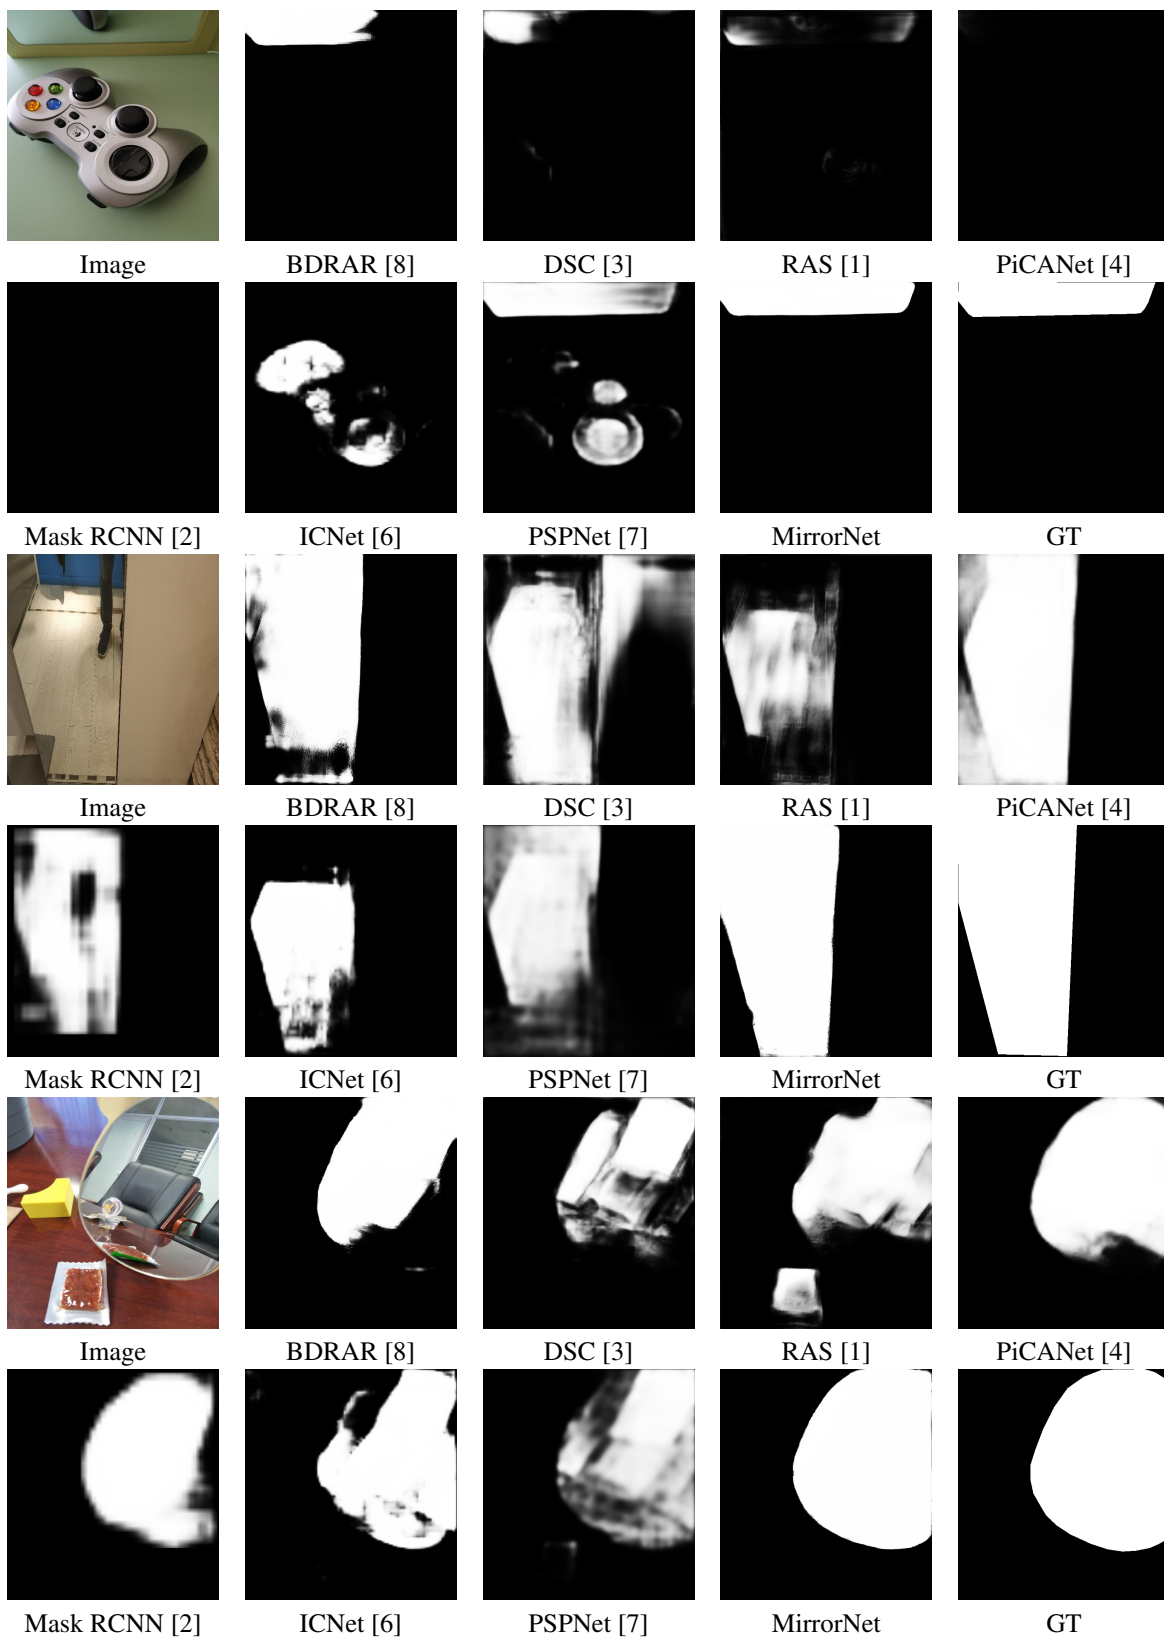

Figure 4. More visual comparison of MirrorNet to the state-of-the-art methods on the proposed MSD test set.



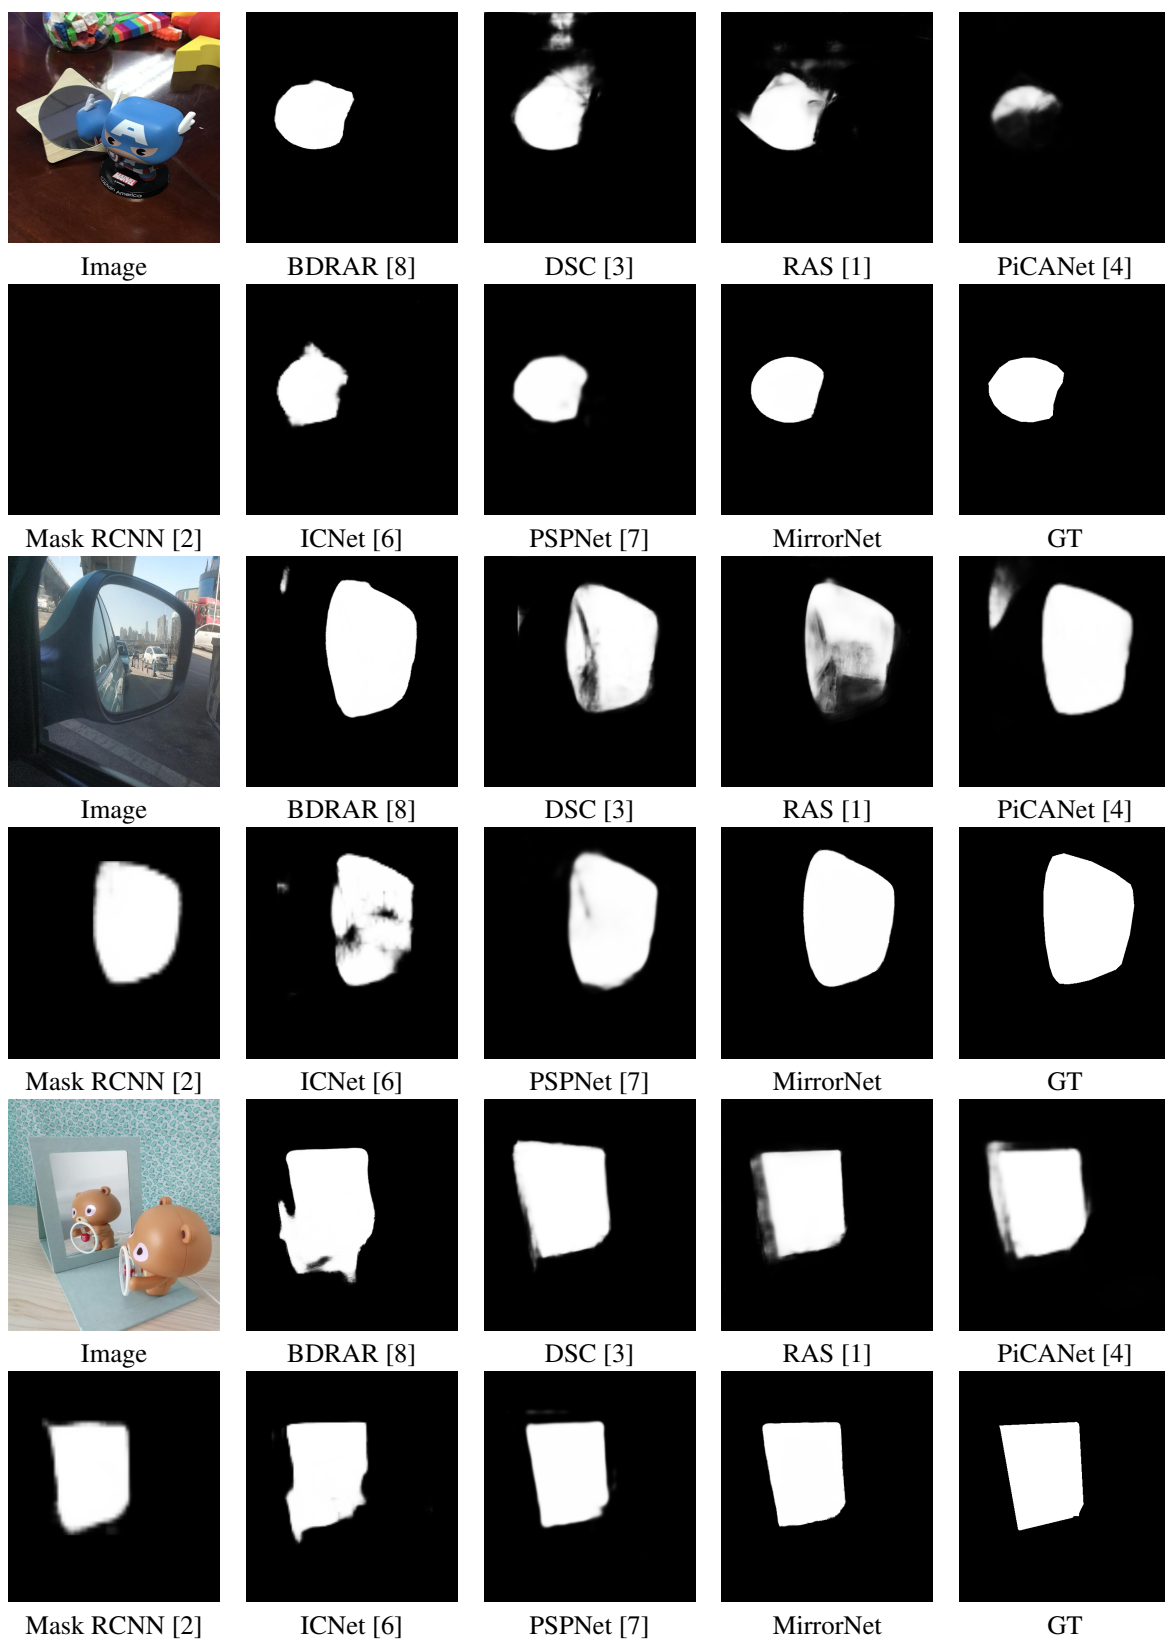

Figure 5. More visual comparison of MirrorNet to the state-of-the-art methods on the proposed MSD test set.

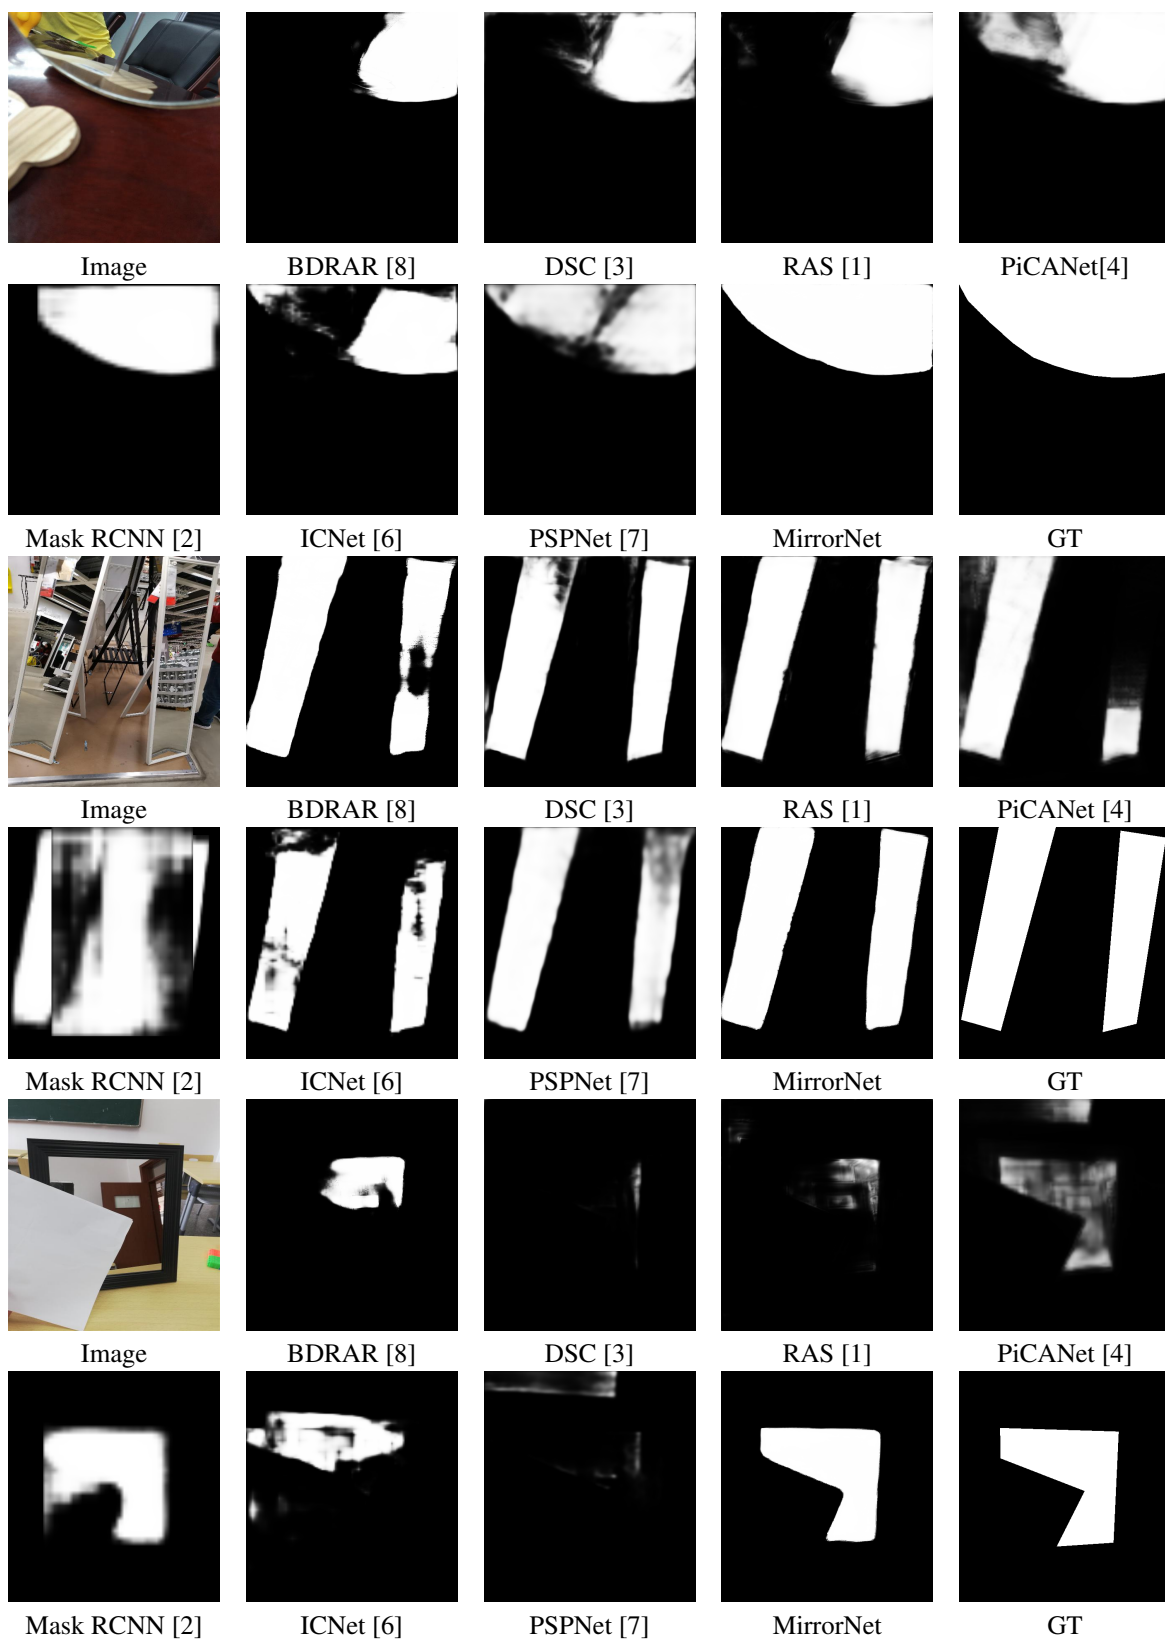

Figure 6. More visual comparison of MirrorNet to the state-of-the-art methods on the proposed MSD test set.

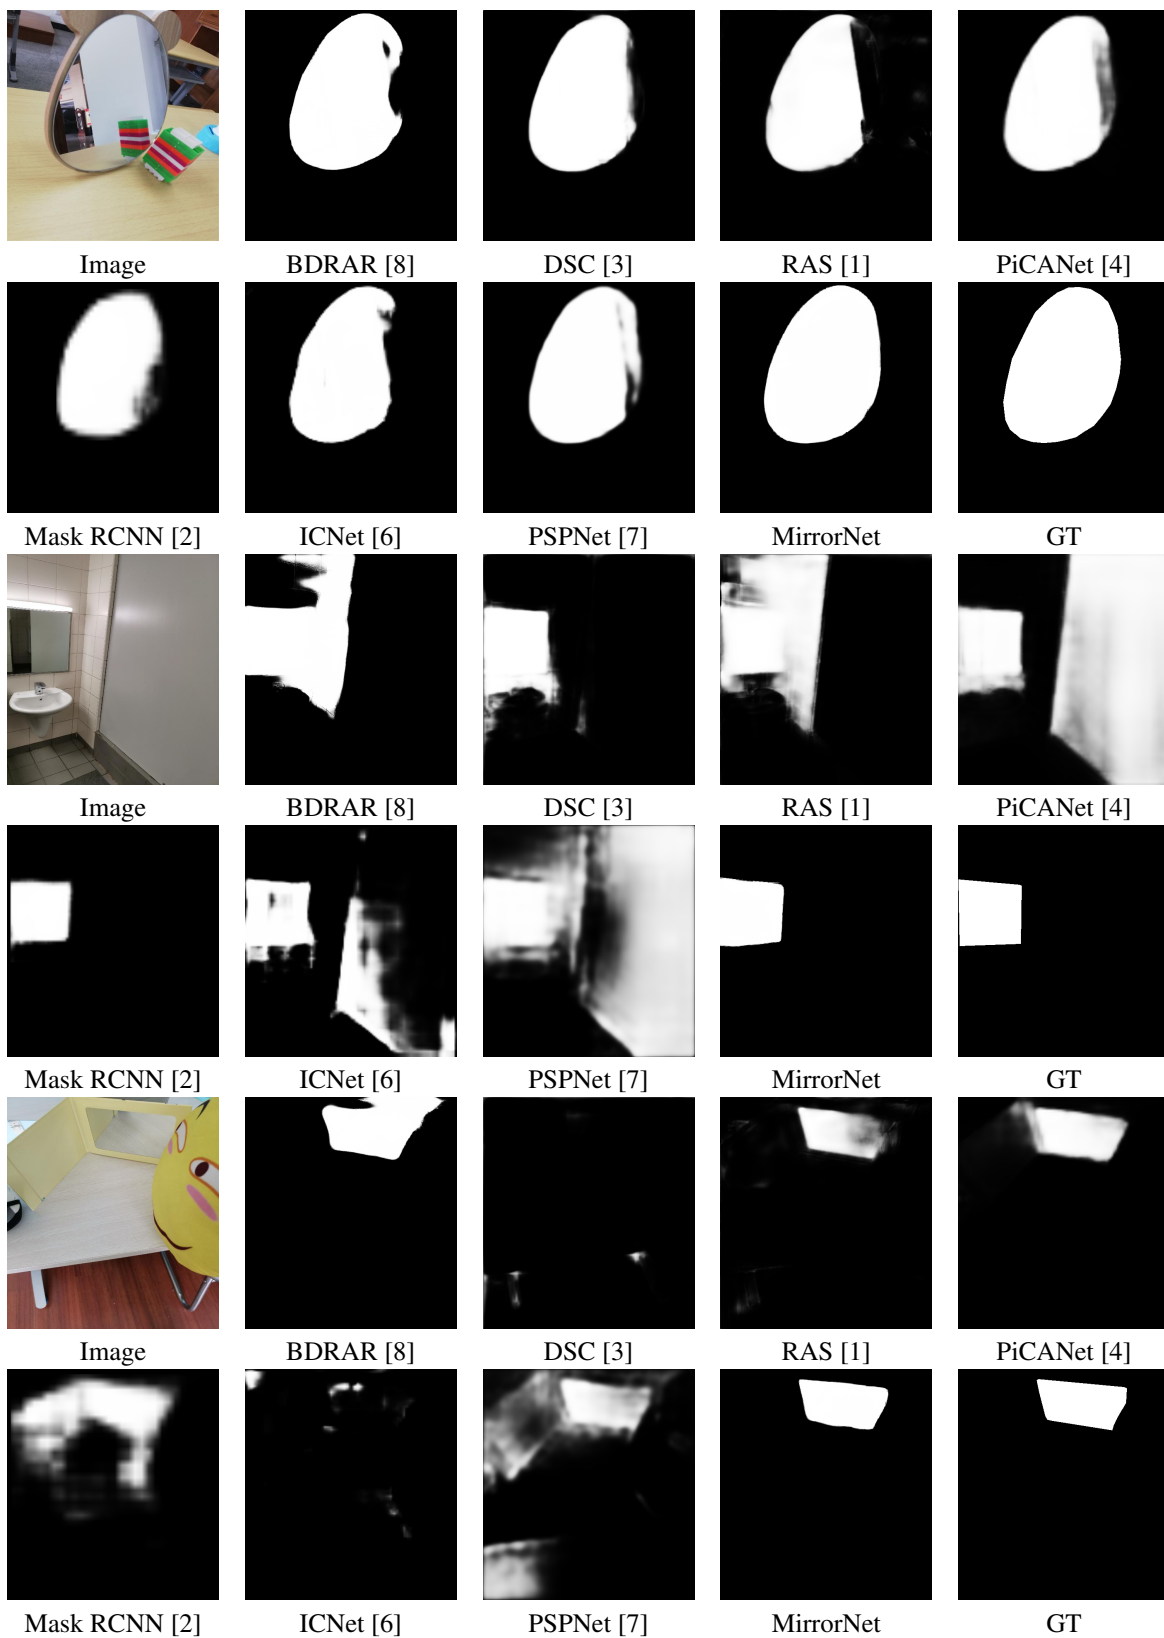

Figure 7. More visual comparison of MirrorNet to the state-of-the-art methods on the proposed MSD test set.

## 5. Comparison on Challenging Images from the Internet

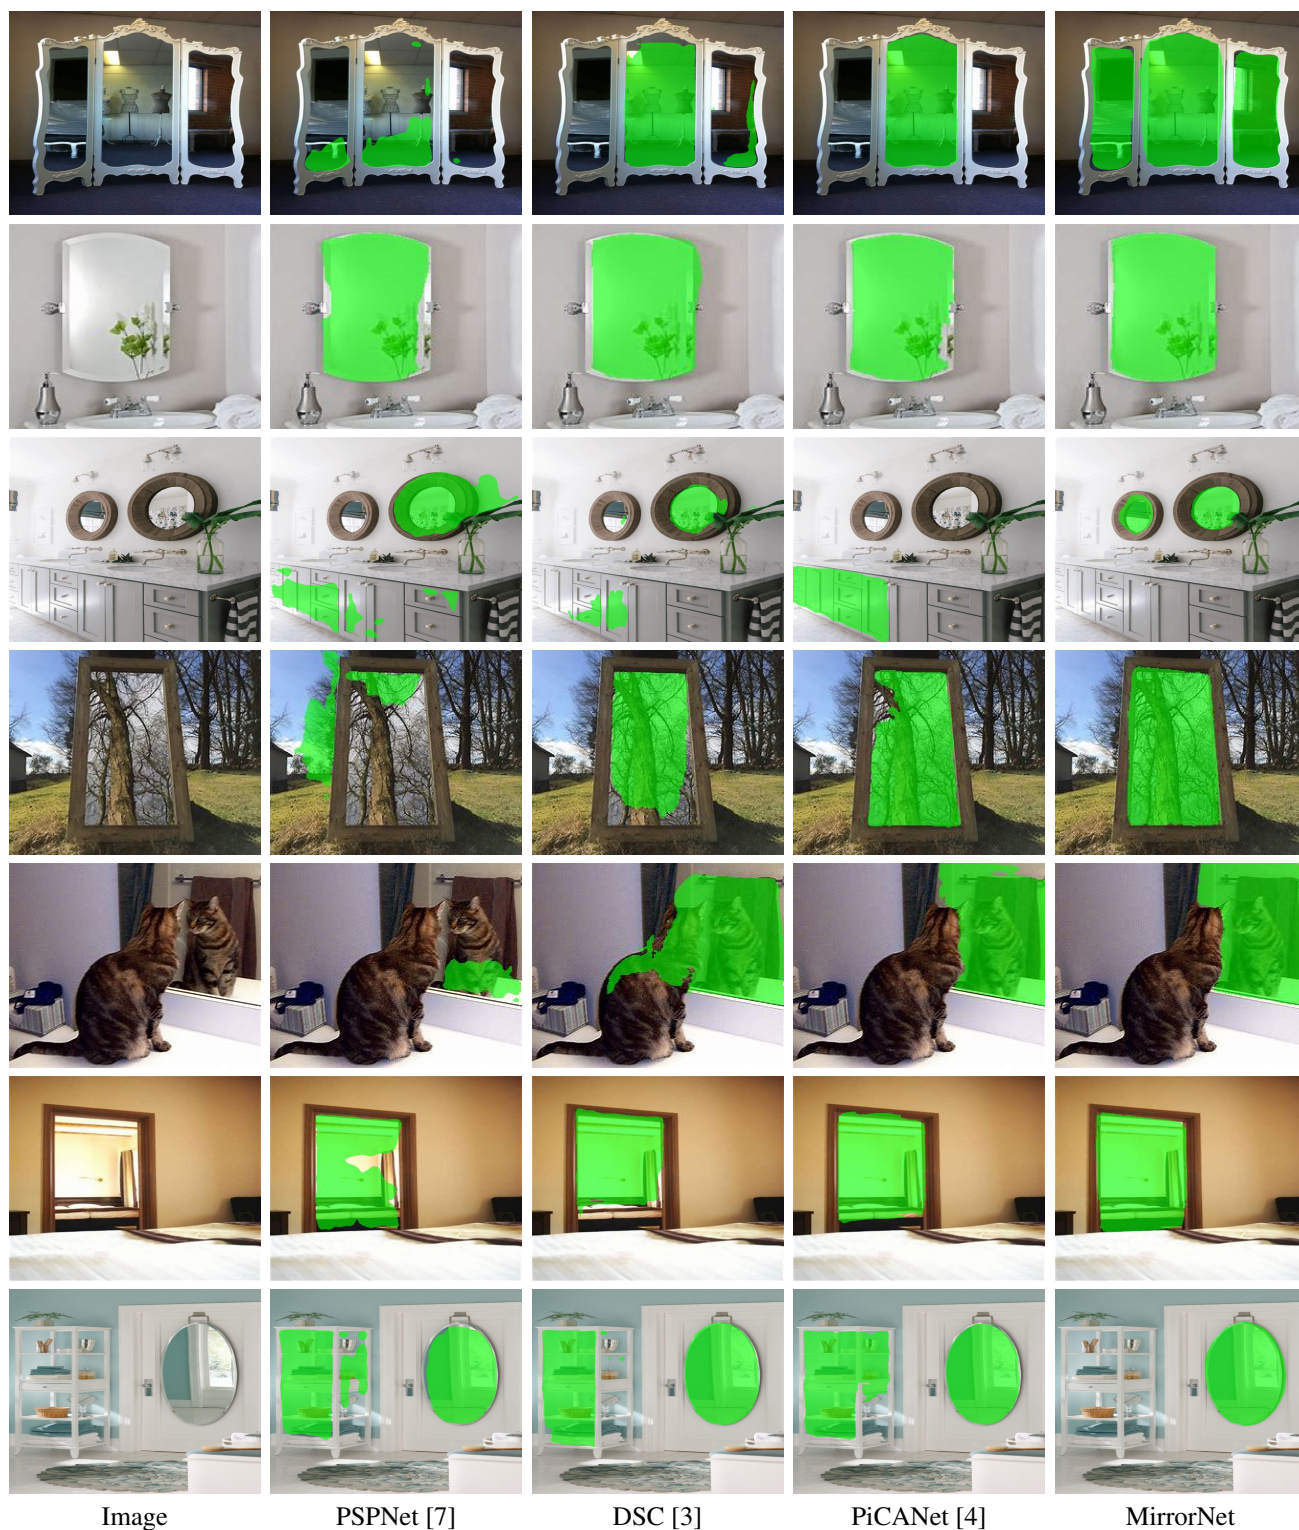

Figure 8. More mirror segmentation results on challenging images obtained from the Internet.



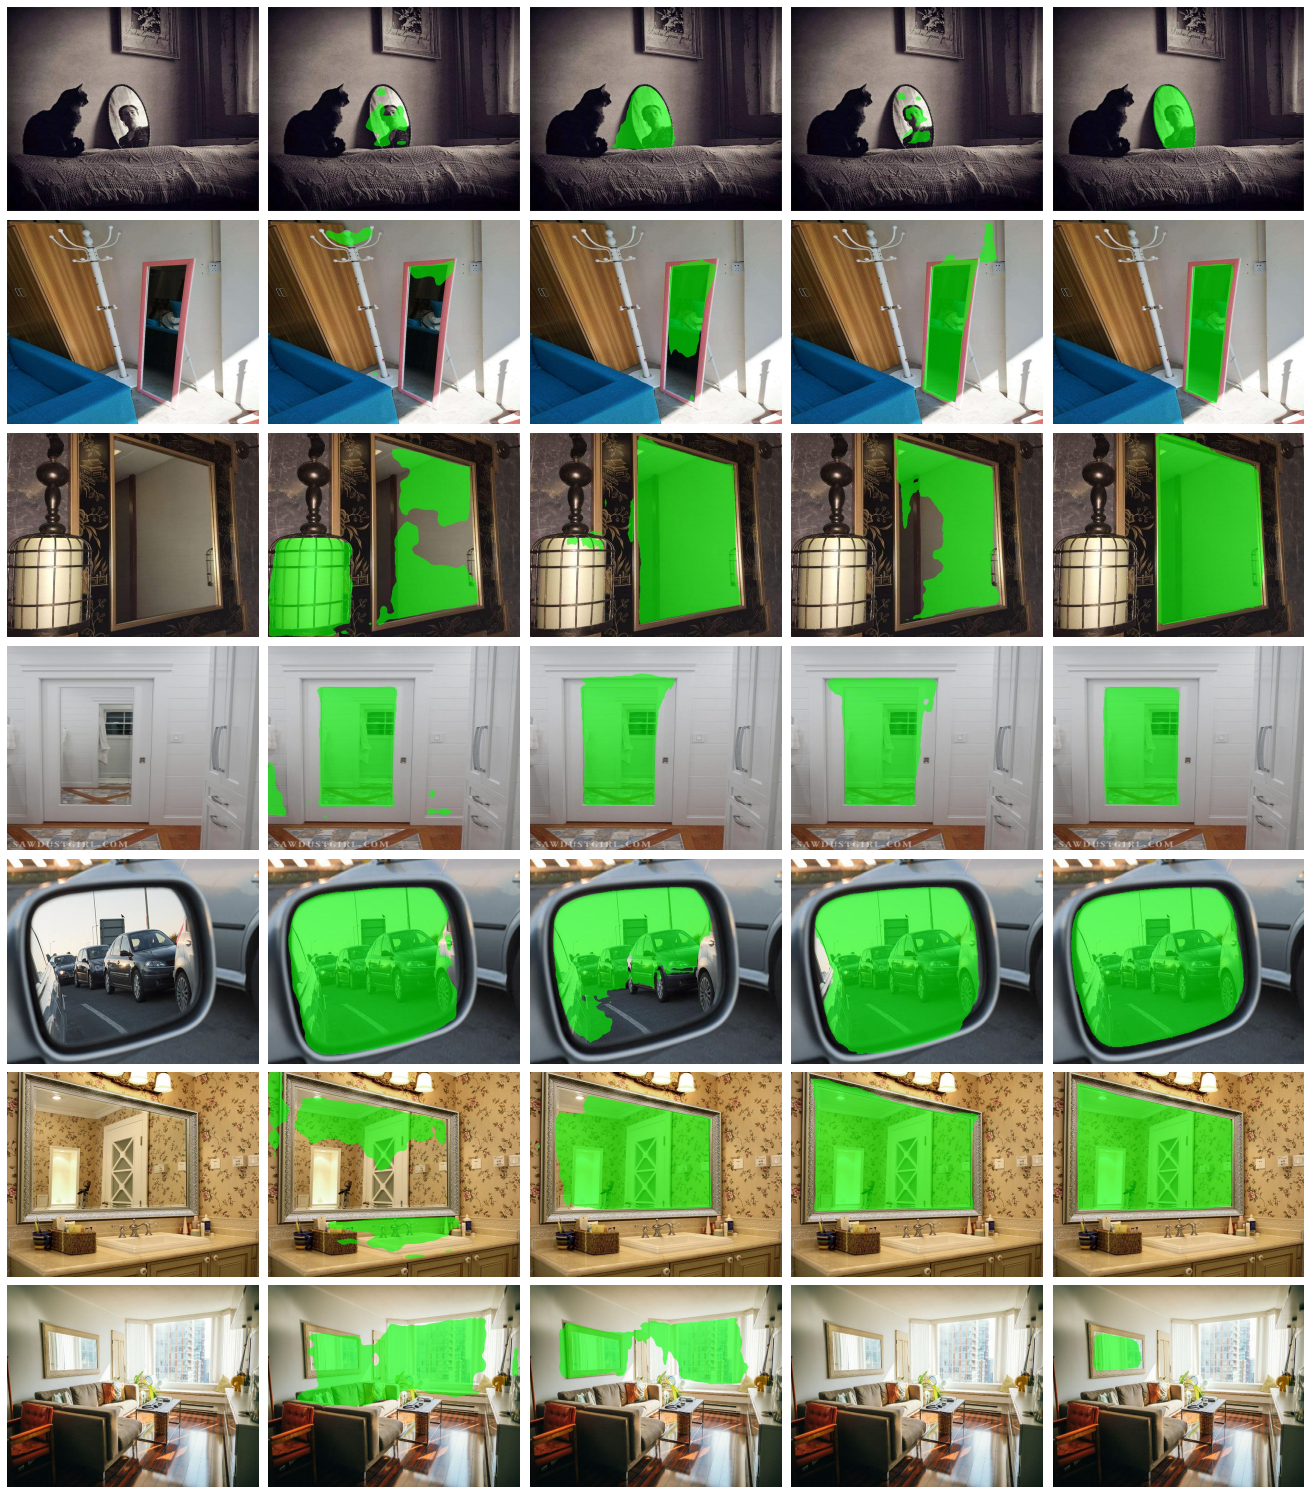

Image

PSPNet [7]

DSC [3]

PiCANet [4]

MirrorNet

Figure 9. More mirror segmentation results on challenging images obtained from the Internet.

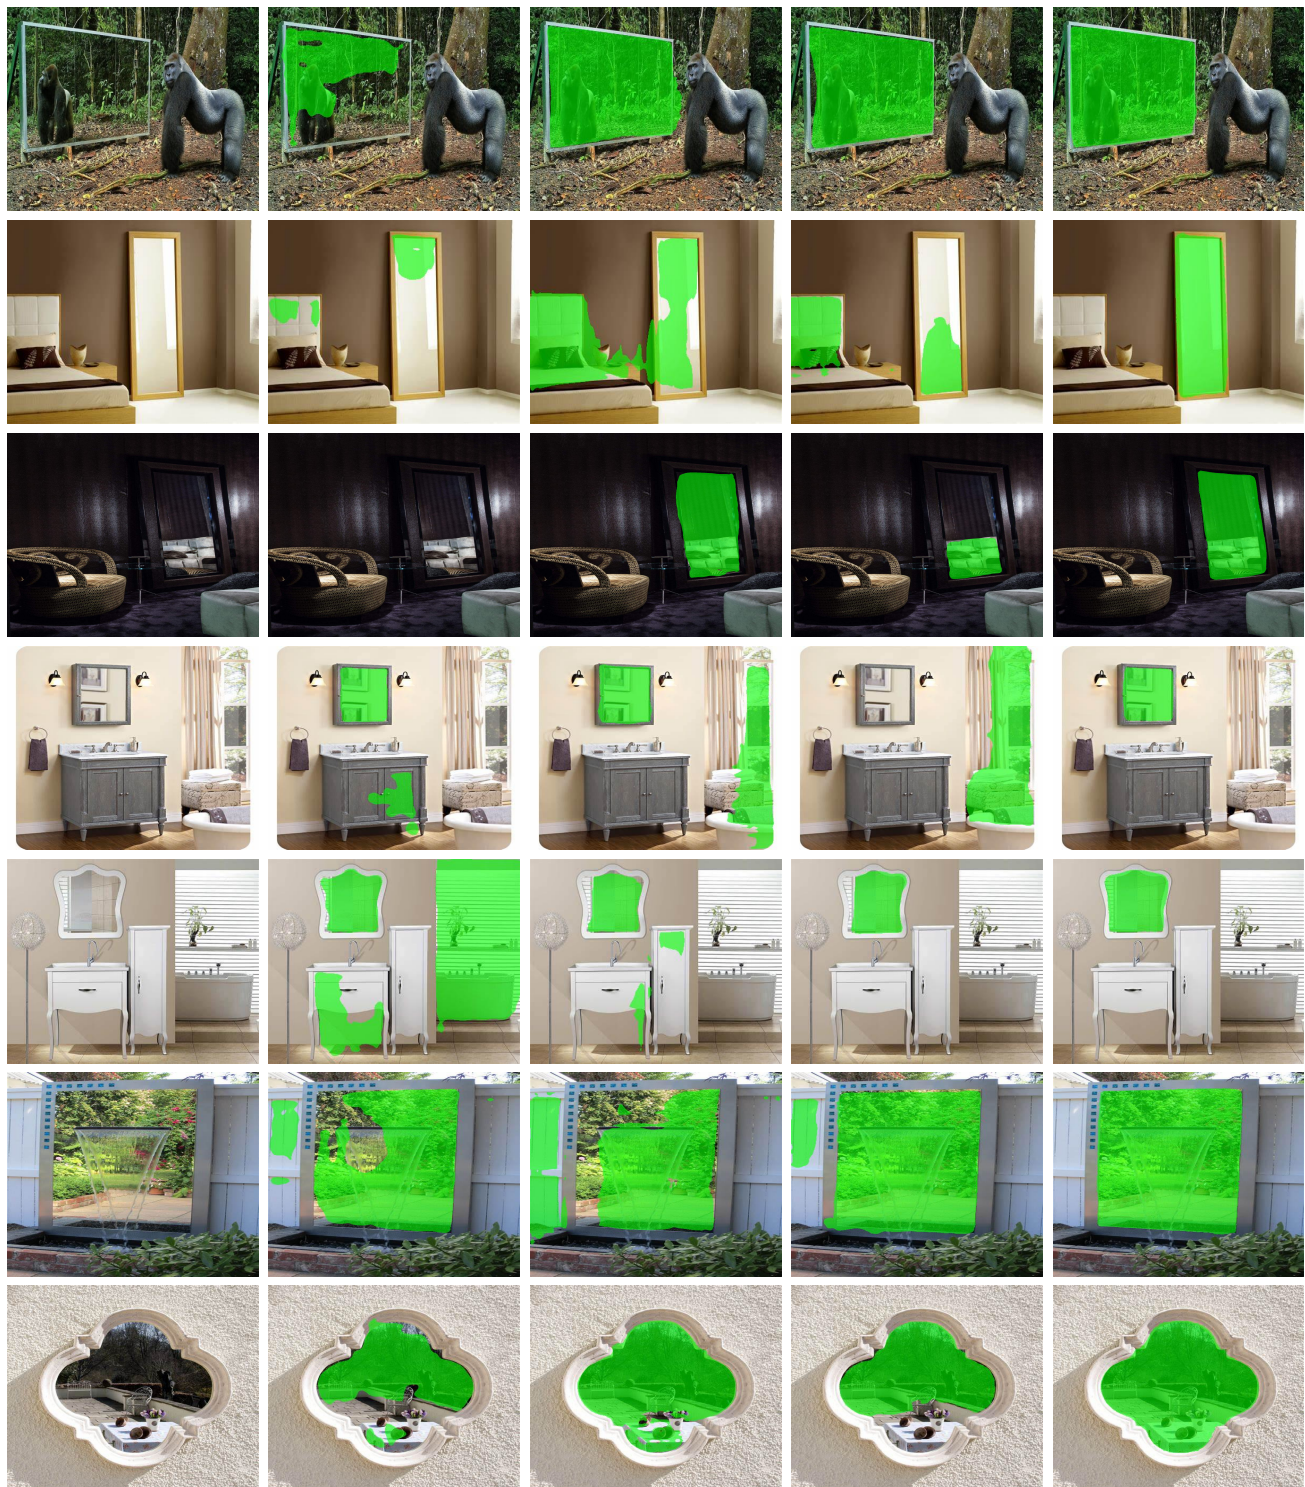

Image

PSPNet [7]

DSC [3]

PiCANet [4]

MirrorNet

Figure 10. More mirror segmentation results on challenging images obtained from the Internet.

## References

- [1] Shuhan Chen, Xiuli Tan, Ben Wang, and Xuelong Hu. Reverse attention for salient object detection. In *ECCV*, 2018.
- [2] Kaiming He, Georgia Gkioxari, Piotr Dollár, and Ross Girshick. Mask R-CNN. In *ICCV*, 2017.
- [3] Xiaowei Hu, Lei Zhu, Chi-Wing Fu, Jing Qin, and Pheng-Ann Heng. Direction-aware spatial context features for shadow detection. In *CVPR*, 2018.
- [4] Nian Liu, Junwei Han, and Ming-Hsuan Yang. Picanet: Learning pixel-wise contextual attention for saliency detection. In *CVPR*, 2018.
- [5] Nathan Silberman, Derek Hoiem, Pushmeet Kohli, and Rob Fergus. Indoor segmentation and support inference from RGBD images. In *ECCV*, 2012.
- [6] Hengshuang Zhao, Xiaojuan Qi, Xiaoyong Shen, Jianping Shi, and Jiaya Jia. Icnet for real-time semantic segmentation on high-resolution images. In *ECCV*, 2018.
- [7] Hengshuang Zhao, Jianping Shi, Xiaojuan Qi, Xiaogang Wang, and Jiaya Jia. Pyramid scene parsing network. In *CVPR*, 2017.
- [8] Lei Zhu, Zijun Deng, Xiaowei Hu, Chi-Wing Fu, Xuemiao Xu, Jing Qin, and Pheng-Ann Heng. Bidirectional feature pyramid network with recurrent attention residual modules for shadow detection. In *ECCV*, 2018.
